# Supplementary material for: Bioactive Phytochemicals of Acacia saligna
Source: Molecules. 2023 May 28;28(11):4396. doi: 10.3390/molecules28114396 (PMC10254483; doi:10.3390/molecules28114396)
Supplement: Supplementary file 1 [file molecules-28-04396-s001.zip › molecules-2408751-supplementary.pdf]

## Supplementary Information

# Bioactive Phytochemicals of *Acacia saligna*

Alison T. Ung<sup>1\*</sup> and Anjar P. Asmara<sup>1</sup>

<sup>1</sup> School of Mathematical and Physical Sciences, Faculty of Science, University of Technology Sydney, Ultimo, NSW 2007, Australia; anjarpurba.asmara@student.uts.edu.au

\* Correspondence: alison.ung@uts.edu.au

**Table S1.** Summary of reported phytochemicals from various parts of *A. saligna*

| Plant parts | Type of extract | Origin       | Analytical methods                                                            | Identified compounds <sup>1</sup> (quantity) <sup>c</sup>                                                                                                                                                                                                                                                                                                                                                                                                                                                       | Ref <sup>2</sup> |
|-------------|-----------------|--------------|-------------------------------------------------------------------------------|-----------------------------------------------------------------------------------------------------------------------------------------------------------------------------------------------------------------------------------------------------------------------------------------------------------------------------------------------------------------------------------------------------------------------------------------------------------------------------------------------------------------|------------------|
| Flowers     | ethyl acetate   | Tunisia      | Single compound isolation <sup>a</sup> and structure elucidation <sup>b</sup> | Quantity reported % w/w of dried flowers: Isosalipurposide <b>1</b> (0.75), <b>quercetin 3</b> (0.002), <b>naringenin 42</b> (trace amount).                                                                                                                                                                                                                                                                                                                                                                    | 11               |
| Flowers     | aqueous         | Egypt        | HPLC                                                                          | Quantity reported in %w/w of crude extract: <b>Quercetin 3</b> (0.112), <b>kaempferol 22</b> (0.0445), <b>naringenin 42</b> (0.145), <b>benzoic acid 24</b> (0.162), <b>syringic acid 28</b> (0.006), <b>p-hydroxybenzoic acid 31</b> (0.014), <b>salicylic acid 32</b> (0.004), <b>caffeic acid 35</b> (0.003), <b>o-coumaric acid 36</b> (0.042), <b>p-coumaric acid 37</b> (0.002), <b>ferulic acid 38</b> (0.007), ellagic acid <b>44</b> (0.012), catechol <b>45</b> (0.007), and caffeine <b>46</b> (0.1) | 12               |
| Flowers     | methanolic      | Australia    | Single compound isolation <sup>a</sup> and structure elucidation <sup>b</sup> | Quantity reported in %w/w of dried flower: <b>naringenin 42</b> (0.183), <b>quercitrin 4</b> (0.432), <b>naringenin-7-O-<math>\alpha</math>-L-arabinofuranoside 47</b> (0.27), D-(+)-pinitol <b>48</b> (0.262), isosalipurposide <b>1</b> (0.159)                                                                                                                                                                                                                                                               | 26               |
| Flowers     | methanolic      | Tunisia      | GC-FID and GC-MS                                                              | Content reported in % of total detected essential oils: nonanal <b>56</b> (66.5% w/w), $\alpha$ -terpineol <b>57</b> (8.4%), heptadecan-2-one <b>58</b> (5.8%), tetradecanoic acid <b>59</b> (5%)                                                                                                                                                                                                                                                                                                               | 14               |
| Leaves      | methanolic      | Saudi Arabia | HPLC                                                                          | Quantity reported in %w/w of crude extract: <b>Quercetin 3</b> (0.006), <b>rutin 6</b> (1.533), <b>miquelianin 7</b> (0.126), <b>isoquercetin 8</b> (0.073), <b>hyperoside 9</b> (0.633), <b>gallic acid 25</b> (0.136), <b>p-coumaric acid 37</b> (0.035).                                                                                                                                                                                                                                                     | 13               |

**Table S1.** Summary of reported phytochemicals from various parts of *A. saligna*

|        |               |              |                                                                               |                                                                                                                                                                                                                                                                                                                                                                                                                                                                                                                                                                   |    |
|--------|---------------|--------------|-------------------------------------------------------------------------------|-------------------------------------------------------------------------------------------------------------------------------------------------------------------------------------------------------------------------------------------------------------------------------------------------------------------------------------------------------------------------------------------------------------------------------------------------------------------------------------------------------------------------------------------------------------------|----|
| Leaves | ethyl acetate | Egypt        | Single compound isolation <sup>a</sup> and structure elucidation <sup>b</sup> | Quantity reported in %w/w of crude extract: <b>Quercetin 3</b> (0.025), <b>quercitrin 4</b> (0.030), <b>quercetin-3-O-arabinoside 5</b> (0.030), <b>myricetin 10</b> (0.025), <b>myricitrin 11</b> (0.034), <b>myricetin-3-O-arabinoside 12</b> (0.028), <b>myricetin-3-O-glucopyranoside 13</b> (0.029), <b>catechin 14</b> (0.025), <b>7-O-Galloyl-cathecin 15</b> (0.029), <b>apigenin 16</b> (0.002), <b>apigetrin 17</b> (0.002), <b>luteolin 19</b> (0.029), <b>cynaroside 20</b> (0.027), <b>gallic acid 25</b> (0.027), <b>methyl gallate 26</b> (0.030). | 16 |
| Leaves | methanolic    | Saudi Arabia | HPLC                                                                          | Quantity reported in %w/w of crude extract: <b>gallic acid 25</b> (0.00543), <b>syringic acid 28</b> (0.00037), <b>chlorogenic 40</b> (trace), <b>p-hydroxybenzoic 31</b> (0.0002), <b>vanillic acid 29</b> (0.0002), <b>p-coumaric acid 37</b> (0.00083), <b>salicylic acid 32</b> (0.00013)                                                                                                                                                                                                                                                                     | 17 |
| Leaves | methanolic    | Egypt        | Single compound isolation <sup>a</sup> and structure elucidation <sup>b</sup> | Quantity reported in %w/w of dried leaves: <b>myricetin-3-O-rhamnoside (C7-O-C7) myricetin-3-O-rhamnoside 33</b> (0.001), <b>quercitrin 4</b> (0.0023) and <b>myricitrin 11</b> (0.00154), spirostane saponin (25S)-5 $\beta$ -spirostan-3 $\beta$ -yl-3-O- $\beta$ -Dxylopyranosyl(1 $\rightarrow$ 3)-O- $\beta$ -D-xylopyranosyl(1 $\rightarrow$ 4)- $\beta$ -D-galactopyranoside <b>55</b> (0.0026), erythrodiol <b>53</b> (0.0081), 3 $\beta$ -O-trans-pcoumaroyl-erythrodiol <b>54</b> (0.00169)                                                             | 25 |
| Leaves | methanolic    | Australia    | Single compound isolation <sup>a</sup> and structure elucidation <sup>b</sup> | Quantity reported in %w/w of dried leaves: <b>(-)-epicatechin 51</b> (0.0.91), <b>quercitrin 4</b> (0.29), <b>myricitrin 11</b> (0.507), 2,4-di- <i>t</i> -butylphenol <b>50</b> (0.101), <b>(-)-pinitol 49</b> (0.913), (3S,5S)-3-hydroxy-5-(2-aminoethyl)-dihydrofuran-2(3H)-one <b>52</b> (0.507).                                                                                                                                                                                                                                                             | 26 |
| Leaves | methanolic    | Tunisia      | (GC-FID and GC/MS)                                                            | Content reported in % of total detected essential oils: nonanal <b>56</b> (22.8%), $\alpha$ -terpineol <b>57</b> (12.1%), 4-oxoisophorone <b>60</b> (11.5%), linalool <b>61</b> (9.4%), heptadecan-2-one <b>58</b> (8.8%), and pentadecanal <b>62</b> (4.7%)                                                                                                                                                                                                                                                                                                      | 14 |
| Leaves | ethanolic     | Egypt        | HPLC                                                                          | Quantity reported on % w/w of total phenolic content (140 $\mu$ g /1g of dried leaves-GAE): <b>rutin 6</b> (15), <b>naringin</b> (7.5), <b>taxifolin</b> (4.6), <b>(+)-catechin</b> (50.8), <b>vanillic acid 29</b> (1.8), <b>syringic acid 28</b> (7.3), <b>methyl gallate 26</b> (1.83), <b>cinnamic acid</b> (0.36), <b>p-coumaric acid 37</b> (1.65), <b>caffeic acid 35</b> (0.73), <b>ferulic acid 38</b> (1.8), ellagic acid <b>44</b> (6.4).                                                                                                              | 30 |
| Leaves | aqueous       | Egypt        | HPLC                                                                          | Quantity reported on % w/w of total phenolic content (200 $\mu$ g /1g of dried leaves- GAE): <b>rutin 6</b> (23.2), <b>naringin</b> (5.2), <b>quercetin 3</b> (3.2), <b>(+)-catechin</b> (23.6), <b>gallic acid 25</b> (19.2), <b>propyl gallate 27</b> (0.8), <b>vanillic acid 29</b> (2), <b>syringic acid 28</b> (1.2), <b>cinnamic acid</b> (0.32), <b>p-coumaric acid 37</b> (6.4), <b>chlorogenic acid 40</b> (12), ellagic acid <b>44</b> (2.8)                                                                                                            | 30 |

**Table S1.** Summary of reported phytochemicals from various parts of *A. saligna*

|       |            |           |                                                                               |                                                                                                                                                                                                                                                                                                                                                                                                                                                                                 |    |
|-------|------------|-----------|-------------------------------------------------------------------------------|---------------------------------------------------------------------------------------------------------------------------------------------------------------------------------------------------------------------------------------------------------------------------------------------------------------------------------------------------------------------------------------------------------------------------------------------------------------------------------|----|
| Bark  | ethanolic  | Egypt     | HPLC                                                                          | Quantity reported in %w/w of crude extract: <b>Quercetin 3</b> (0.0037), <b>rutin 6</b> (0.0016), <b>kaempferol 22</b> (0.0011), <b>benzoic acid 24</b> (0.0158), <b>gallic acid 25</b> (0.0255), <b>vanillin 29</b> (0.007), <b>caffeic acid 35</b> (0.0054), <b>o-coumaric acid 36</b> (0.0011), <b>p-coumaric acid 37</b> (0.0008), <b>ferulic acid 38</b> (0.0042), <b>rosmarinic acid 39</b> (0.005), <b>chlorogenic acid 40</b> (0.0104), and caffeine <b>46</b> (0.0107) | 18 |
| Bark  | methanolic | Australia | Single compound isolation <sup>a</sup> and structure elucidation <sup>b</sup> | Quantity reported in %w/w of dried barks: <b>(-)-epicatechin 51</b> (0.185), <b>D-(+)-pinitol 48</b> (1.303), sucrose (6.87)                                                                                                                                                                                                                                                                                                                                                    | 26 |
| Seeds | methanolic | Tunisia   | GC-MS                                                                         | Content reported in % of the total content of fatty acid (101.7 g/ kg of dried weight of seeds): linoleic acid <b>63</b> (61.11–65.45% of total fatty acid content), and oleic acid <b>64</b> (19.67–22.85%), palmitic <b>65</b> (9.18–9.98%), stearic <b>66</b> (1.49–1.82%), vaccenic <b>67</b> (1.13–2.05%) and palmitoleic <b>68</b> (0.34–0.58%) acids                                                                                                                     | 35 |

<sup>a</sup> compounds isolation by column chromatography; <sup>b</sup> structure elucidation by 1D & 2D NMR and mass spectrometry; <sup>c</sup> reported quantity of identified compounds.

<sup>1</sup> group of compounds colour code; **green: flavonoids**, **red: benzoic acid and derivatives**, **blue: cinnamic acids**, black: others.

<sup>2</sup>. Please refer to the references list in the main article.
